# Supplementary material for: Antioxidant Capacity and Phenolics Profile of Portuguese Traditional Cultivars of Apples and Pears and Their By-Products: On the Way to Newer Applications
Source: MDPI journal article supplement (doi:10.3390/foods12071537), 2023-04-05
Supplement: s1 [file s1]

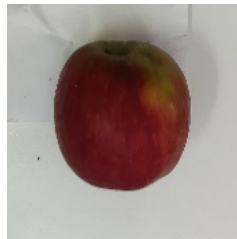

Noiva

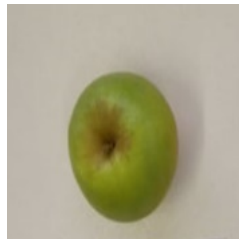

Repinau

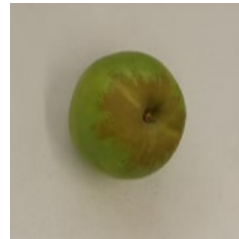

Pêro Coimbra

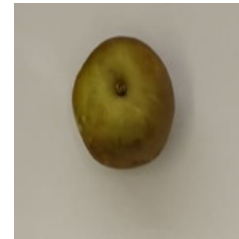

Pardo Lindo

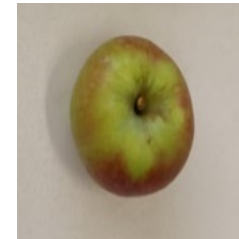

Pêro de Borbela

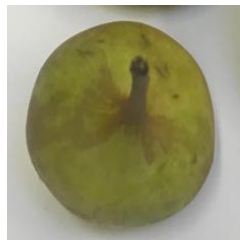

Carapinha

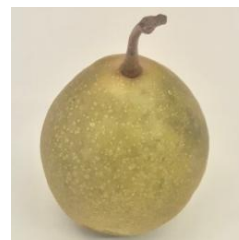

Bela-Feia

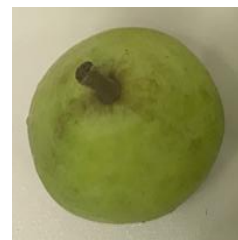

Torres Novas

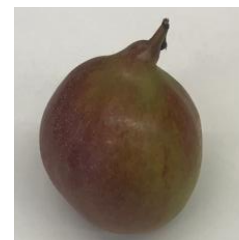

Carapinha  
Roxa

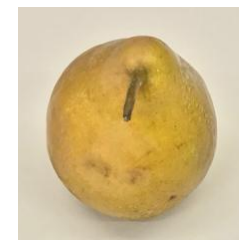

Lambe-os-  
Dedos

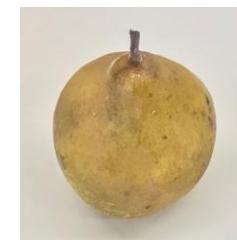

Amorim

Figure S1: Photos of the traditional cultivars of apples and pears selected for the study.
